# Supplementary material for: Histone acylation marks respond to metabolic perturbations and enable cellular adaptation
Source: PubMed Central journal article supplement (PMC8080766; doi:10.1038/s12276-020-00539-x), 2020-12-11
Supplement: 12276_2020_539_MOESM1_ESM.pdf [file 12276_2020_539_MOESM1_ESM.pdf]

## **Histone acylation marks respond to the metabolic perturbations for cellular adaptation**

Chanhee Jo<sup>1</sup>, Seokjae Park<sup>2,3</sup>, Sungjoon Oh<sup>2,3</sup>, Jinmi Choi<sup>1,4</sup>, Eun-Kyoung Kim<sup>2,3</sup>, Hong-Duk Youn<sup>4</sup>, Eun-Jung Cho<sup>1\*</sup>

<sup>1</sup>School of Pharmacy, Sungkyunkwan University, Suwon, Gyeonggi-do 440-746, Republic of Korea <sup>2</sup>Department of Brain and Cognitive Sciences, <sup>3</sup>Neurometabolomics Research Center, Daegu Gyeongbuk Institute of Science and Technology, Daegu 42988, Republic of Korea <sup>4</sup>National Creative Research Center for Epigenome Reprogramming Network, Seoul National University College of Medicine, Seoul 03080, Republic of Korea

\*Correspondence should be addressed to E.-J. Cho; email: [echo@skku.edu](mailto:echo@skku.edu) Tel: +82-31-290-7781, FAX +82-31-292-8800

Supplemental Figure S1. Jo et al.

**a**

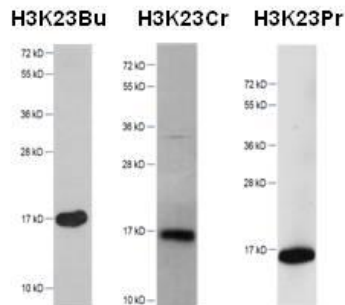

**b**

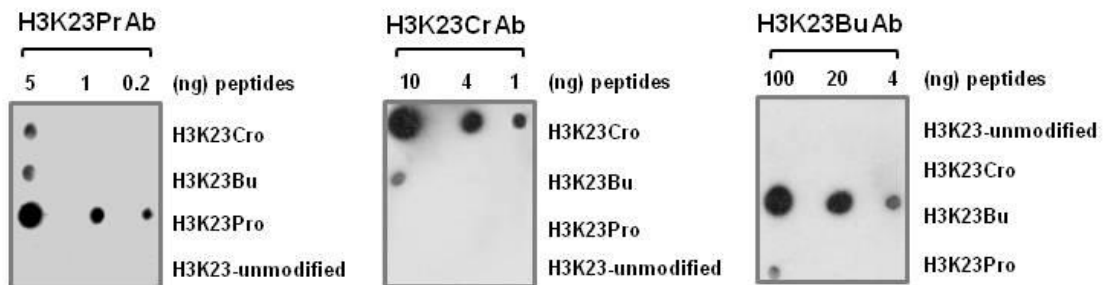

**Supplemental Figure S1. Generation of H3K23 acylation-specific antibodies.** (a) WB of 30  $\mu$ g of HeLa whole cell lysates using H3K23Pr, H3K23Cr, and H3K23Bu antibodies. (b) Dot blot analysis of the indicated amount of peptides using indicated antibodies; final concentration, 0.5  $\mu$ g/mL.

Supplemental Figure S2. Jo et al.

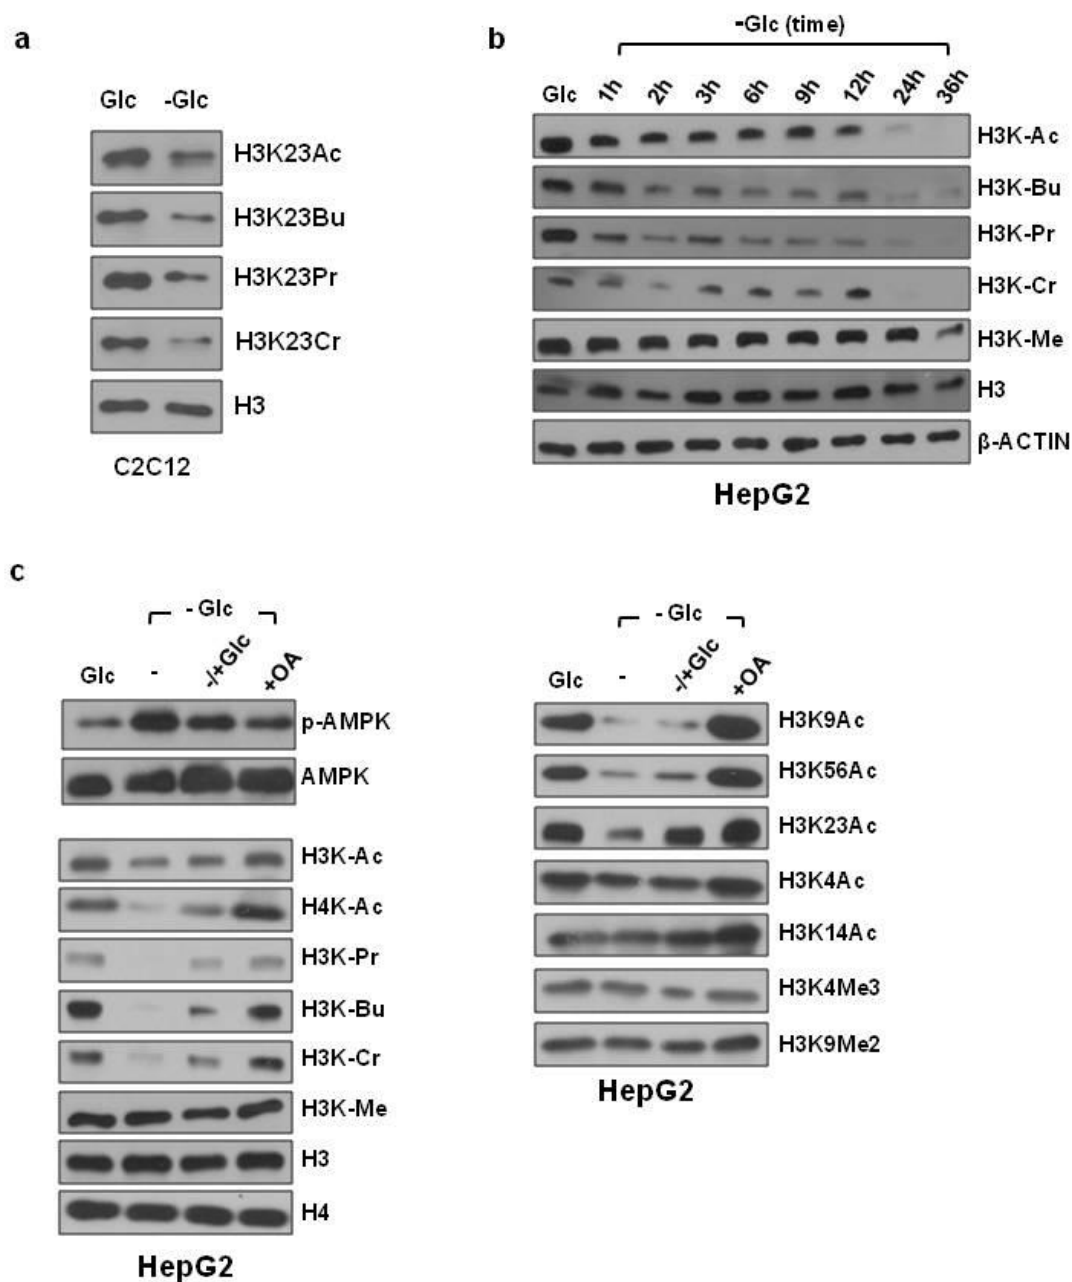

**Supplemental Figure S2. Global histone acylation is affected by glucose and fatty acid.**

(a) WB of H3K23 acylations in C2C12 myotubes grown in "Glc", high glucose-DMEM; "-Glc", no glucose-DMEM for 24 h. (b) WB of cellular proteins of HepG2 cells grown in glucose-deficient culture medium for the indicated durations. (c) WB of cellular proteins of HepG2 cells grown in indicated culture conditions. Cells were cultivated in "Glc", high glucose DMEM for 24 h; "-Glc", no glucose DMEM for 24 h with fatty acid-free BSA; "-/+Glc", no glucose DMEM for 24 h followed by high glucose DMEM for 12 h; "+OA", no glucose DMEM for 24 h with oleic acid (OA)-conjugated BSA (200  $\mu$ M of oleic acid).

Supplemental Figure S3. Jo et al.

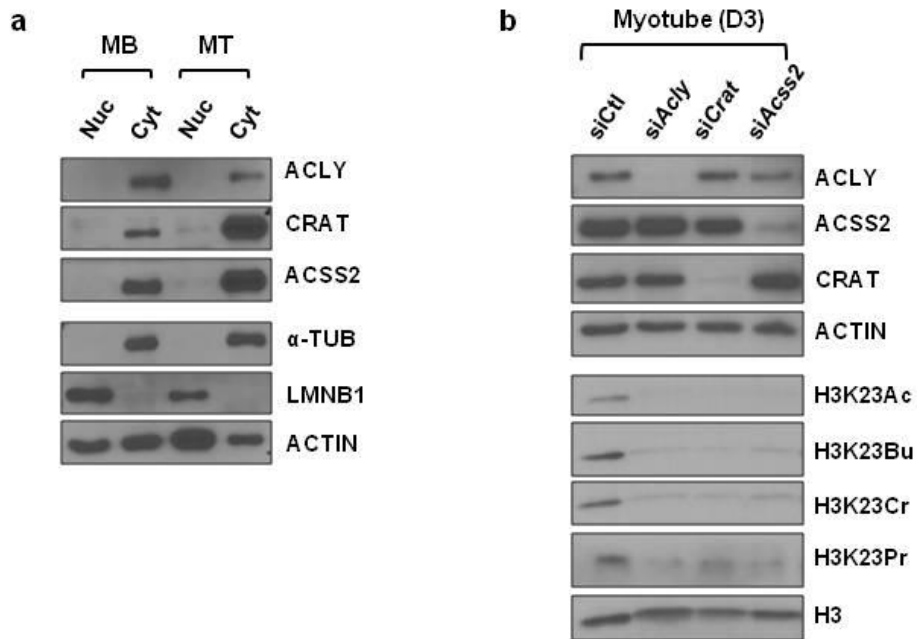

**Supplemental Figure S3. ACLY, CRAT and ACSS2 are localized in the cytosol, and are required for H3K23 acylation.** (a) WB of nuclear and cytosolic fractions of C2C12 myoblasts (MB) and myotubes (MT). Cellular localization of ACLY, CRAT, and ACSS2 protein was analyzed, showing that these enzymes were predominantly localized in the cytoplasm of both myoblast and myotube C2C12 cells. (b) WB of H3K23 acyl modifications in C2C12 myotubes. Myoblast cells were transfected with indicated siRNAs and differentiated for 3 days.

Supplemental Figure S4. Jo et al.

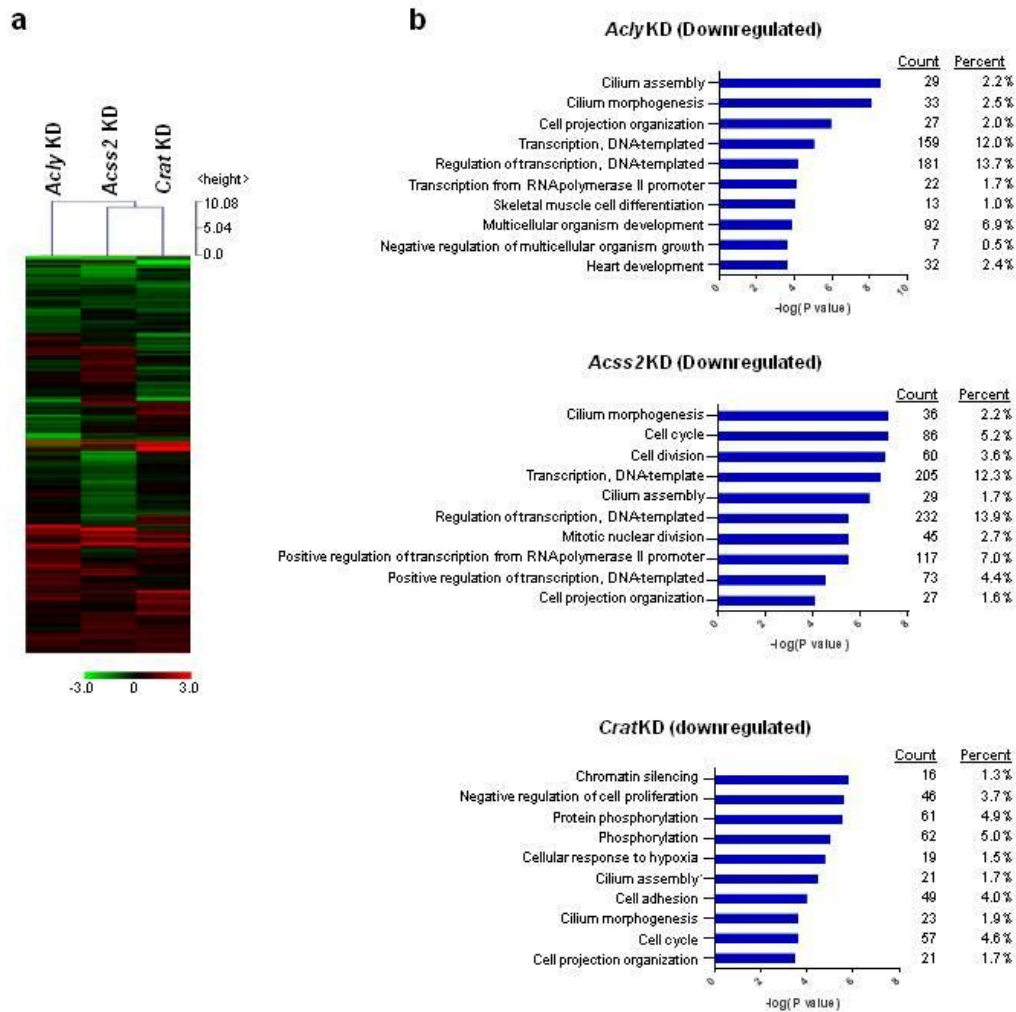

**Supplemental Figure S4. Transcriptome analysis of *Acly*, *Crat* and *Acss2* KD.** (a) Heatmap of all expressed genes in *Acly*, *Acss2*, and *Crat* KD C2C12 myoblasts using RNA-seq data (relative to siCtl,  $|FC| \geq 1.5$ ). (b) DAVID GO analysis using significantly upregulated gene sets ( $|FC| \geq 1.5$ ). The top 10 ranked biological functions are shown in order of ascending p-value. Each siRNAKD sample was compared with siCtl.

Supplemental Figure S5. Jo et al.

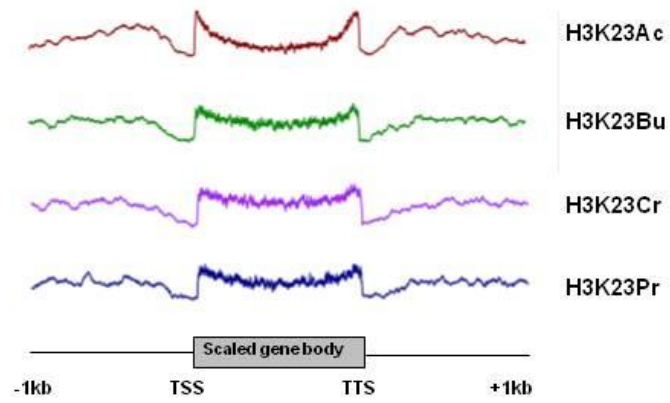

**Supplemental Figure S5. Total metagene profile of normalized coverage of the indicated histone acylations.** Gene bodies were scaled to have an equal length. C2C12 myoblast cells were analyzed by ChIP-seq with indicated H3K23 acyl modification-specific antibodies.

**Table 1.** Antibodies used in this study:

| <b>ANTIBODIES</b>                                         | <b>SOURCE</b>    | <b>IDENTIFIER</b>               |
|-----------------------------------------------------------|------------------|---------------------------------|
| Rabbit polyclonal anti-H3Ac                               | Millipore        | Cat#06-599                      |
| Rabbit polyclonal anti-Pan butyryl-lysine                 | PTM bio          | Cat#PTM-301                     |
| Rabbit polyclonal anti-Pan propionyl-lysine               | PTM bio          | Cat#PTM-201                     |
| Rabbit polyclonal anti-Pan crotonyl-lysine                | PTM bio          | Cat#PTM-501                     |
| Rabbit polyclonal anti-H3                                 | Abcam            | Cat#ab1791                      |
| Rabbit polyclonal anti-H3K9Ac                             | Cell signaling   | Cat#9671                        |
| Rabbit polyclonal anti-H3K56Ac                            | Active motif     | Cat#39281                       |
| Rabbit monoclonal anti-H4Ac (clone 62-141-13)             | Millipore        | Cat#05-858                      |
| Rabbit polyclonal anti-H3K23Ac                            | Active motif     | Cat#39131                       |
| Rabbit polyclonal anti-H3K23Bu                            | PTM bio          | Custom-made Lot# PZ016C0728P059 |
| Mouse polyclonal anti-H3K23Cr                             | PTM bio          | Custom-made Lot# PZ022C1210M365 |
| Rabbit polyclonal anti-H3K23Pr                            | PTM bio          | Custom-made Lot# PZ017C0910P065 |
| Rabbit polyclonal anti-H3K4Ac                             | Active motif     | Cat#39381                       |
| Rabbit polyclonal anti-H3K4me                             | Upstate          | Cat#07-436                      |
| Rabbit polyclonal anti-H3K9me2                            | Upstate          | Cat#07-441                      |
| Rabbit polyclonal anti-Lamin B1                           | Abcam            | Cat#ab16048                     |
| Rabbit polyclonal anti-ATP-Citrate Lyase (ACLY)           | Cell signaling   | Cat#4332                        |
| Rabbit polyclonal anti-Carnitine Acetyltransferase (CRAT) | Cloud-clone corp | Cat#PAC400Mu01                  |
| Rabbit monoclonal anti-AceCS1 (clone D19C6) (ACSS2)       | Cell signaling   | Cat#3658                        |
| Mouse monoclonal anti-actin (clone C4)                    | Millipore        | Cat#MAB1501                     |
| Rabbit polyclonal anti-Pan methyl-lysine                  | Abcam            | Cat#ab7315                      |

|                                                                    |                |               |
|--------------------------------------------------------------------|----------------|---------------|
| Mouse monoclonal anti-flag (clone M2)                              | Sigma          | Cat#F3165     |
| Rabbit polyclonal anti-alpha tubulin                               | Abfrontier     | Cat#LF-PA0146 |
| Rabbit monoclonal anti-phospho-AMPK $\alpha$ (Thr172) (Clone 40H9) | Cell signaling | Cat#2535      |
| Rabbit polyclonal anti-AMPK $\alpha$                               | Cell signaling | Cat#2532      |



**Table 2.** siRNAs and primer sequences used in this study:

| <b>NAME</b>                           | <b>SOURCE</b> | <b>SEQUENCE or IDENTIFIER</b>                                      |
|---------------------------------------|---------------|--------------------------------------------------------------------|
| control siRNA                         | Bioneer       | SN-1003                                                            |
| si <i>Acly</i>                        | Bioneer       | CAG CAA AGA UGU UCA GUA ATT                                        |
| si <i>Crat</i>                        | Bioneer       | CCA AGA AAC UGG UGG AUG ATT                                        |
| si <i>Acss2</i>                       | Bioneer       | ACA AAU ACA AGG UGA CCA ATT                                        |
| <i>Ccp110</i> ChIP primer<br>region A | Bioneer       | Fw: 5'-AATAAGCACCAGGAGGACGG-3'<br>Rv: 5'-CTTTGCAGATCAGTTGCGGG-3'   |
| <i>Ccp110</i> ChIP primer<br>region B | Bioneer       | Fw: 5'- GCGCTCTGTCTAAACCGACT-3'<br>Rv: 5'- GGGTCTCACCTCAGCCTAGA-3' |
